# Supplementary material for: Expansion of HIV-specific T follicular helper cells in chronic HIV infection
Source: JCI journal article supplement (doi:10.1172/jci64314), 2012-08-27
Supplement: sd1 [file 1]

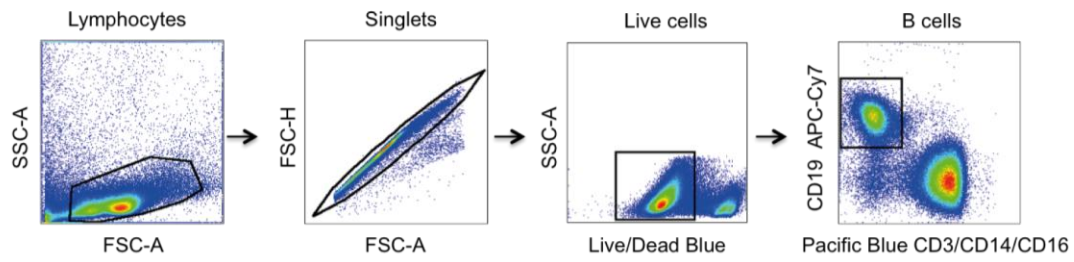

*Supplementary Figure S.1. Flow cytometric gating strategy for B cells.* Lymphocytes were defined based on the forward (FSC-A) and side (SSC-A) scatter. After exclusion of doublets (FSC-H versus FSC-A), live cells were identified based on amine-reactivity using Live/Dead Blue dye. B cells were then characterized as CD3<sup>-</sup>, CD14<sup>-</sup>, CD16<sup>-</sup> and CD19<sup>+</sup>.

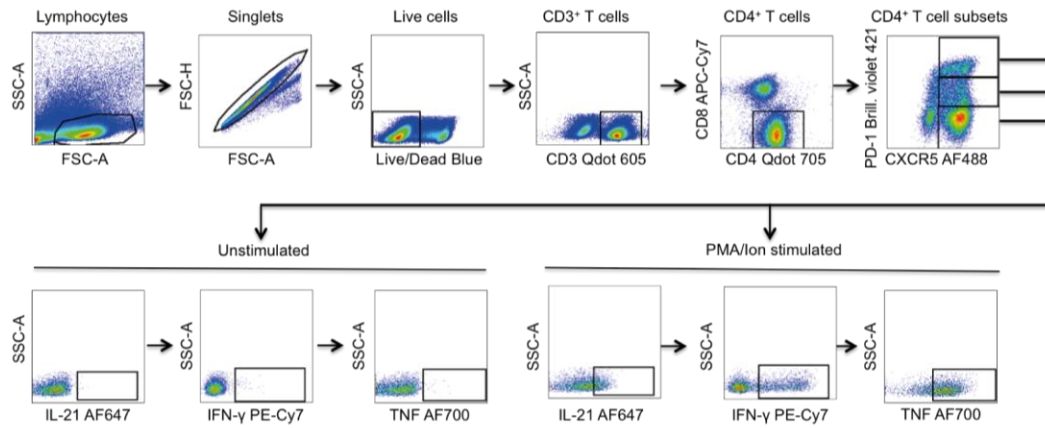

*Supplementary Figure S.2. Flow cytometric gating strategy for CD4 T cell responses.* Lymphocytes were defined based on the forward (FSC-A) and side (SSC-A) scatter. After exclusion of doublets (FSC-H versus FSC-A), live cells were identified based on amine-reactivity using Live/Dead Blue dye. CD4 T cells were then characterized as CD3<sup>+</sup>, CD4<sup>+</sup>, CD8<sup>-</sup>. Unstimulated controls were used to set gates for positive cytokine responses.

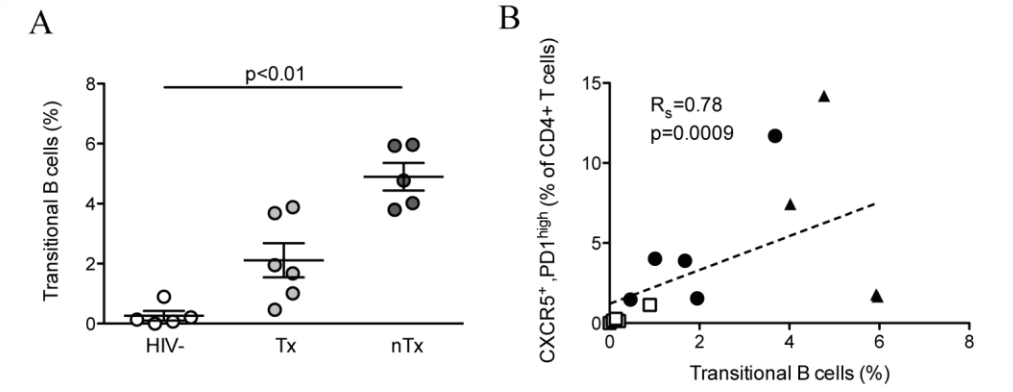

*Supplementary Figure S.3. Transitional B cells are increased in chronic HIV infection and correlate with expansion of TFH cells.* The frequency of transitional B cells in the lymph node of uninfected, HIV infected treated and untreated individuals were measured by flow cytometry. Live B lymphocytes in lymph nodes were gated on CD3<sup>-</sup>,CD14<sup>-</sup>,CD16<sup>-</sup>, CD19<sup>+</sup> and transitional B cells were further characterized as CD38<sup>++</sup>, IgD<sup>+</sup>, CD27<sup>-</sup>, IgM<sup>+</sup> B cells. (A) Increased frequency of transitional B cells in chronic HIV infected, treatment naive (nTx) individuals compared to treated (Tx) and HIV negative individuals. (B) A significant correlation between transitional B cells and TFH cell frequency in the lymph node was detected ( $R_s=0.78$ ;  $p=0.009$ ). (HIV- (open squares); HIV+ untreated (filled triangle), and HIV+ treated (filled circle).
